# Supplementary material for: Hollow titanium dioxide spheres as anode material for lithium ion battery with largely improved rate stability and cycle performance by suppressing the formation of solid electrolyte interface layer
Source: Royal Society of Chemistry journal article supplement (doi:10.1039/c5ta02070k), 2015-01-01
Supplement: c5ta02070k1.pdf [file c5ta02070k1.pdf]

## **Supporting Information**

### **Hollow Titanium Dioxide Spheres as Anode Material for Lithium Ion Battery with Largely Improved Rate Stability and Cycle Performance by Suppressing the Formation of Solid Electrolyte Interface Layer**

Cuiping Han,<sup>a,b,c</sup> Di Yang,<sup>a,d</sup> Yingkui Yang,<sup>a,e</sup> Beibei Jiang,<sup>a</sup> Yanjie He,<sup>a</sup> Mengye Wang,<sup>a</sup>

Ah-Young Song,<sup>a</sup> Yan-Bing He,<sup>b</sup> Baohua Li,<sup>b\*</sup> and Zhiqun Lin<sup>a\*</sup>

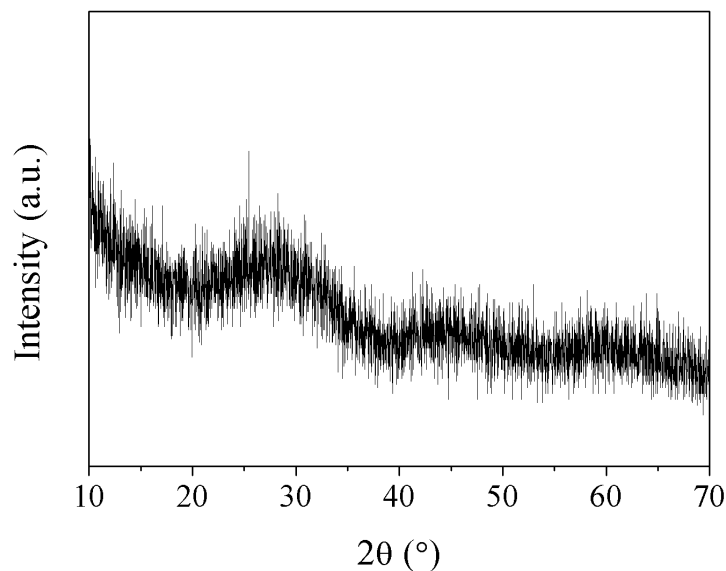

**Figure S1.** XRD patterns of as-prepared colloidal TiO<sub>2</sub> nanoparticles.

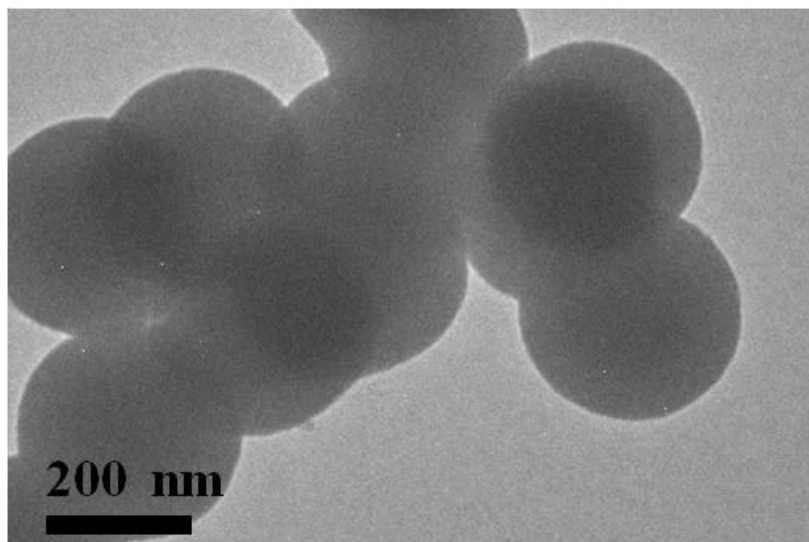

**Figure S2.** TEM image of as-prepared colloidal TiO<sub>2</sub> nanoparticles.

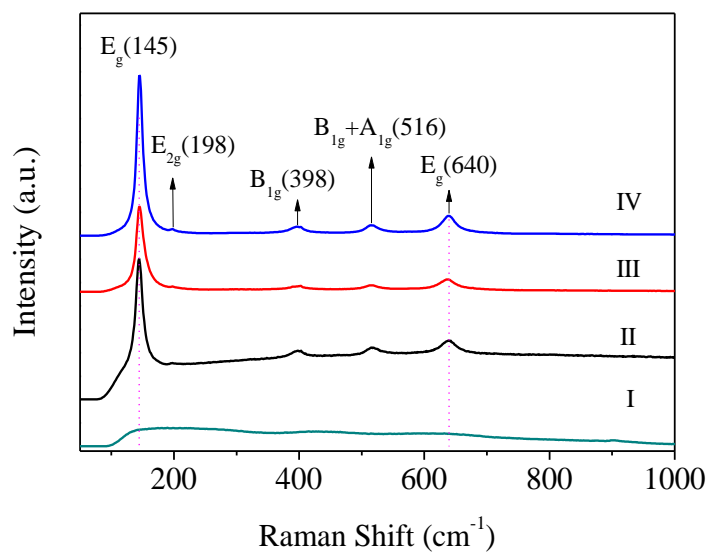

**Figure S3.** Raman spectra of (I) as-prepared colloidal TiO<sub>2</sub> nanoparticles, (II) annealed TiO<sub>2</sub> solid nanoparticles, (III) TiO<sub>2</sub> hollow spheres after hydrothermal treatment, and (IV) annealed TiO<sub>2</sub> hollow spheres.

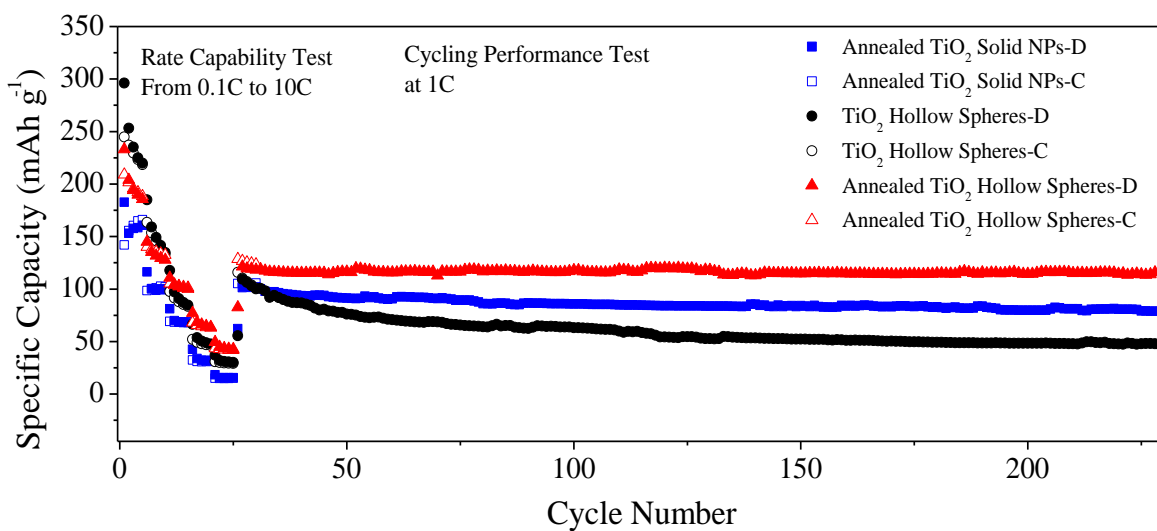

**Figure S4.** Rate capability and cycling performance tests as demonstrated in Figure 6. Note that the figure is divided into Figure 6a and 6b for a better comparison.

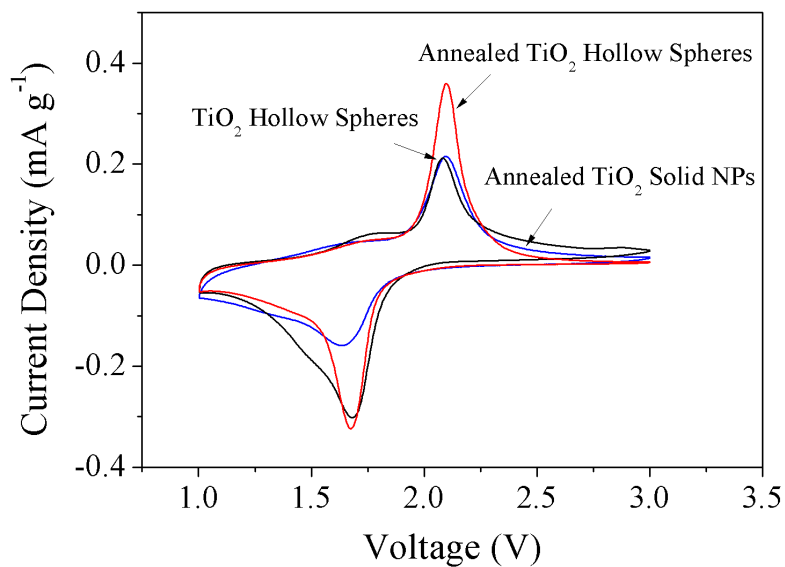

**Figure S5.** CV characteristics of annealed TiO<sub>2</sub> solid nanoparticles, TiO<sub>2</sub> hollow spheres, and annealed TiO<sub>2</sub> hollow spheres at a scanning rate of 0.2mVs<sup>-1</sup>.

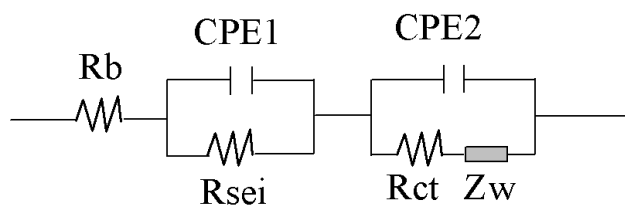

**Figure S6.** The equivalent circuit used for the EIS simulation in Figure 6.
